# Supplementary material for: A promising small-sized near-infrared absorbing zwitterionic dye for DSSC and NLO applications: DFT and TD-DFT approaches
Source: Royal Society of Chemistry journal article supplement (doi:10.1039/d3cp03858k), 2023-01-01
Supplement: d3cp03858k1.pdf [file d3cp03858k1.pdf]

# A promising small-sized near-infrared absorbing zwitterionic dyes for DSSC and NLO applications: DFT and TD-DFT approach

Suryapratap J. Sharma, and Nagaiyan Sekar\*

Dyestuff Technology Department (Currently named as Department of Speciality Chemicals Technology), Institute of Chemical Technology, N. P. Marg, Matunga, Mumbai, 400019, Maharashtra, India

E-mail: [nethi.sekar@gmail.com](mailto:nethi.sekar@gmail.com), [n.sekar@ictmumbai.edu.in](mailto:n.sekar@ictmumbai.edu.in) (N. Sekar)

[suryapratap412@gmail.com](mailto:suryapratap412@gmail.com), [chy16sj.sharma@pg.ictmumbai.edu.in](mailto:chy16sj.sharma@pg.ictmumbai.edu.in) (S. J. Sharma)

## Index

| Sr No | Title                                                                                                                                                                                                 | Page no |
|-------|-------------------------------------------------------------------------------------------------------------------------------------------------------------------------------------------------------|---------|
| 1     | SI Fig. 1 Optimized geometries of ZIDM, ZIMCA, and ZIDCA bound with TiO <sub>2</sub> cluster using B3LYP/6-31G(d)/LANL2DZ                                                                             | 2       |
| 2     | SI Fig. 2 MEP plots of ZIDM@TiO <sub>2</sub> , ZIMCA@TiO <sub>2</sub> , and ZIDCA@TiO <sub>2</sub> with NOTiO <sub>2</sub> and CATiO <sub>2</sub> binding modes                                       | 3       |
| 3     | SI Table 1 Computed $\Delta G_{inject}$ , $\Delta G_{reg}$ , LHE, and V <sub>oc</sub> of ZIDM, ZIMCA, and ZIDCA optimized at DFT and TD-DFT results of CAM-B3LYP/6-311++G (d, p) level of theory      | 3       |
| 4     | SI Table 2 Computed $\Delta G_{inject}$ , $\Delta G_{reg}$ , LHE, and V <sub>oc</sub> of ZIDM, ZIMCA, and ZIDCA optimized at DFT and TD-DFT results of $\omega$ B97XD/6-311++G (d, p) level of theory | 3       |

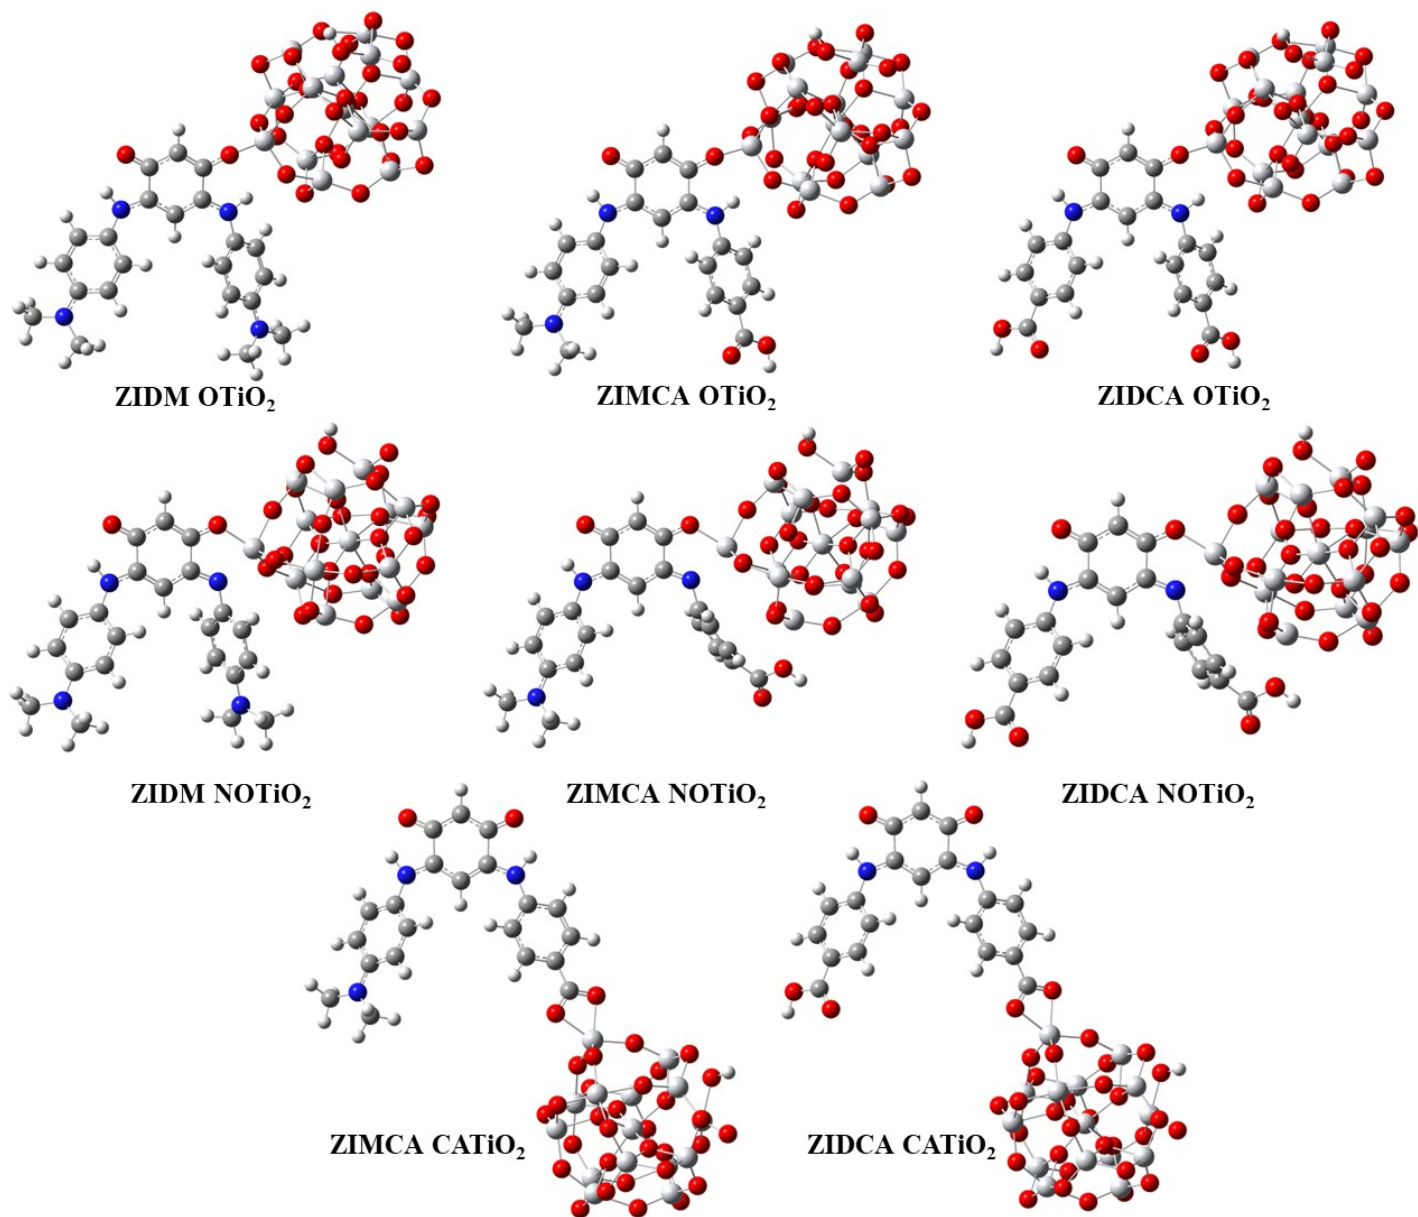

SI Fig. 1 Optimized geometries of ZIDM, ZIMCA, and ZIDCA bound with TiO<sub>2</sub> cluster using B3LYP/6-31G(d)/LANL2DZ

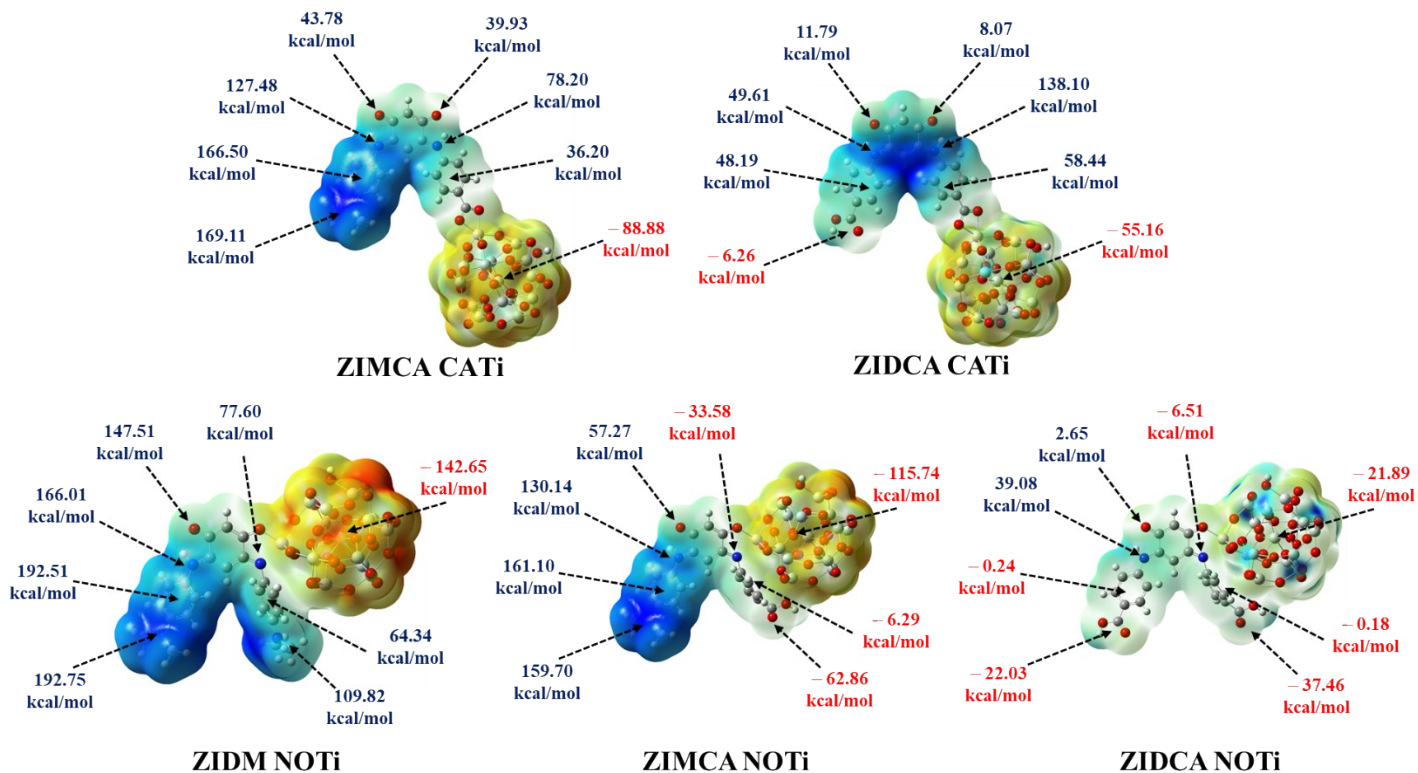

SI Fig. 2 MEP plots of ZIDM@TiO<sub>2</sub>, ZIMCA@TiO<sub>2</sub>, and ZIDCA@TiO<sub>2</sub> with NOTiO<sub>2</sub> and CATiO<sub>2</sub> binding modes

SI Table 1 Computed  $\Delta G_{inject}$ ,  $\Delta G_{reg}$ , LHE, and  $V_{oc}$  of ZIDM, ZIMCA, and ZIDCA optimized at DFT and TD-DFT results of CAM-B3LYP/6-311++G (d, p) level of theory

| Dyes  | Phase | $E_{ox}^{dye}$ | $E_{ox}^{dye*}$ | $\Delta E$ | $\Delta G_{inject}$ | $\Delta G_{reg}$ | LHE    | $V_{oc}$ |
|-------|-------|----------------|-----------------|------------|---------------------|------------------|--------|----------|
|       |       | (eV)           | (eV)            | (eV)       | (eV)                | (eV)             | -      | (eV)     |
| ZIDM  | Gas   | 6.67           | 4.39            | 2.28       | 0.39                | 1.87             | 0.0041 | 2.56     |
|       | DCM   | 6.71           | 4.39            | 2.32       | 0.39                | 1.91             | 0.2084 | 2.17     |
| ZIMCA | Gas   | 7.00           | 4.82            | 2.18       | 0.82                | 2.20             | 0.0014 | 2.06     |
|       | DCM   | 6.91           | 4.63            | 2.28       | 0.63                | 2.11             | 0.1364 | 1.91     |
| ZIDCA | Gas   | 7.32           | 5.21            | 2.11       | 1.21                | 2.52             | 0.0002 | 1.66     |
|       | DCM   | 7.54           | 5.26            | 2.27       | 1.26                | 2.74             | 0.0064 | 1.69     |

SI Table 2 Computed  $\Delta G_{inject}$ ,  $\Delta G_{reg}$ , LHE, and  $V_{oc}$  of ZIDM, ZIMCA, and ZIDCA optimized at DFT and TD-DFT results of  $\omega$ B97XD/6-311++G (d, p) level of theory

| Dyes  | Phase | $E_{ox}^{dye}$ | $E_{ox}^{dye*}$ | $\Delta E$ | $\Delta G_{inject}$ | $\Delta G_{reg}$ | LHE    | $V_{oc}$ |
|-------|-------|----------------|-----------------|------------|---------------------|------------------|--------|----------|
|       |       | (eV)           | (eV)            | (eV)       | (eV)                | (eV)             | -      | (eV)     |
| ZIDM  | Gas   | 7.21           | 4.93            | 2.28       | 0.93                | 2.41             | 0.0016 | 3.17     |
|       | DCM   | 7.29           | 4.95            | 2.34       | 0.95                | 2.49             | 0.1457 | 2.78     |
| ZIMCA | Gas   | 7.51           | 5.32            | 2.18       | 1.32                | 2.71             | 0.0002 | 2.71     |
|       | DCM   | 7.46           | 5.17            | 2.29       | 1.17                | 2.66             | 0.0863 | 2.53     |
| ZIDCA | Gas   | 7.81           | 5.70            | 2.11       | 1.70                | 3.01             | 0.0007 | 2.35     |
|       | DCM   | 8.07           | 5.79            | 2.28       | 1.79                | 3.27             | 0.0039 | 2.33     |
